# Supplementary material for: Potential bias of daily soil CO2 efflux estimates due to sampling time
Source: PubMed Central journal article supplement (PMC5607316; doi:10.1038/s41598-017-11849-y), 2017-09-20
Supplement: 41598_2017_11849_MOESM1_ESM.pdf [file 41598_2017_11849_MOESM1_ESM.pdf]

# Potential bias of daily soil CO<sub>2</sub> efflux estimates due to sampling time

Alejandro Cueva<sup>1\*</sup>, Stephen H. Bullock<sup>1</sup>, Eulogio López-Reyes<sup>1</sup>, Rodrigo Vargas<sup>2</sup>

Affiliations:

<sup>1</sup>Departamento de Biología de la Conservación, Centro de Investigación Científica y de Educación Superior de Ensenada, B.C., Ensenada, Baja California 22860, México

<sup>2</sup>Department of Plant and Soil Sciences, University of Delaware, Newark, DE 19716, USA

\*Corresponding author:

Alejandro Cueva

Departamento de Biología de la Conservación

Centro de Investigación Científica y de Educación Superior de Ensenada, B.C.

Ensenada, Baja California 22860, México

Email: [acueva@cicese.edu.mx](mailto:acueva@cicese.edu.mx)

**Supplementary Table 1.** Bayesian paired samples Student's T-test of the time series of soil respiration data

| T-test                                 |            | Bayes Factor* |
|----------------------------------------|------------|---------------|
| Shrub corrected – Shrub uncorrected    | All year   | 582.1         |
| Trench corrected – Trench uncorrected  | All year   | 22.08         |
| Shrub corrected – Trench corrected     | All year   | 37.41         |
| Shrub uncorrected – Trench uncorrected | All year   | 1.04          |
|                                        |            |               |
| Shrub corrected – Shrub uncorrected    | Dry season | 4.41          |
| Trench corrected – Trench uncorrected  | Dry season | 5.17          |
| Shrub corrected – Trench corrected     | Dry season | 1.69          |
| Shrub uncorrected – Trench uncorrected | Dry season | 1.61          |
|                                        |            |               |
| Shrub corrected – Shrub uncorrected    | Wet season | 36.03         |
| Trench corrected – Trench uncorrected  | Wet season | 20.07         |
| Shrub corrected – Trench corrected     | Wet season | 47.01         |
| Shrub uncorrected – Trench uncorrected | Wet season | 0.45          |

\*Values of Bayes Factor >1 indicates that data are *n* times better supported by the alternative hypothesis than by the null hypothesis

**Supplementary Table 2.** Bayesian linear relationships of soil respiration with soil temperature (Temp) and soil moisture (SWC).

| Treatment          | Season     | Temp                 | BF   | R <sup>2</sup> | SWC                 | BF*  | R <sup>2</sup> |
|--------------------|------------|----------------------|------|----------------|---------------------|------|----------------|
| Shrub-corrected    | All-year   | -0.05 (-0.1, 0.003)  | 1.58 | 0.3            | 6.54 (2.04, 11.05)  | 5.65 | 0.51           |
| Shrub-uncorrected  | All-year   | -0.05 (-0.1, 0.006)  | 1.42 | 0.28           | 7.06 (2.0, 12.1)    | 4.88 | 0.49           |
| Trench-corrected   | All-year   | -0.025 (-0.06, 0.01) | 0.89 | 0.188          | 4.75 (0.98, 8.5)    | 3.44 | 0.44           |
| Trench-uncorrected | All-year   | -0.04 (-0.09, 0.01)  | 1.09 | 0.23           | 7.24 (2.04, 12.4)   | 4.83 | 0.49           |
| Shrub-corrected    | Dry season | -0.005 (-0.12, 0.11) | 0.57 | 0.004          | 6.24 (-54.1, 66.7)  | 0.58 | 0.02           |
| Shrub-uncorrected  | Dry season | -0.006 (-0.15, 0.14) | 0.57 | 0.004          | 7.4 (-64.0, 78.8)   | 0.58 | 0.02           |
| Trench-corrected   | Dry season | 0.005 (-0.06, 0.07)  | 0.57 | 0.01           | -9.87 (-68.5, 48.8) | 0.6  | 0.05           |
| Trench-uncorrected | Dry season | 0.006 (-0.07, 0.09)  | 0.57 | 0.01           | -11.8 (-81.8, 58.2) | 0.6  | 0.05           |
| Shrub-corrected    | Wet season | 0.19 (0.003, 0.37)   | 2.04 | 0.66           | 3.67 (-5.1, 12.5)   | 0.79 | 0.25           |
| Shrub-uncorrected  | Wet season | 0.21 (0.003, 0.41)   | 2.04 | 0.67           | 4.1 (-5.7, 13.8)    | 0.79 | 0.25           |
| Trench-corrected   | Wet season | 0.18 (0.04, 0.31)    | 3.15 | 0.77           | 3.05 (-5.03, 11.1)  | 0.75 | 0.22           |
| Trench-uncorrected | Wet season | 0.25 (0.06, 0.44)    | 3.13 | 0.77           | 4.3 (-7.1, 15.7)    | 0.75 | 0.22           |

\*Values of Bayes Factor (BF) >1 indicates that data are *n* times better supported by the alternative hypothesis than by the null hypothesis
